# Supplementary material
Source: PubMed Central journal article supplement (PMC3627373)
Supplement: NIHMS443591-supplement-02.pdf [file NIHMS443591-supplement-02.pdf]

## Supplemental Materials

### Estimating Spatiotemporal Variability of Ambient Air Pollutant Concentrations with A Hierarchical Model

Lianfa Li<sup>1,2</sup>, Jun Wu<sup>1§</sup>, Jo Kay Ghosh<sup>3</sup>, Beate Ritz<sup>4</sup>

<sup>1</sup> Program in Public Health, College of Health Sciences, University of California, Irvine, USA

<sup>2</sup> State Key Lab of Resources and Environmental Information Systems, Institute of Geographical Sciences and Natural Resources Research, Chinese Academy of Sciences, China

<sup>3</sup> Department of Preventive Medicine, Keck School of Medicine, University of Southern California, Los Angeles, USA

<sup>4</sup> Department of Epidemiology, School of Public Health, University of California, Los Angeles, USA

\* Corresponding author: Program in Public Health & Department of Epidemiology, Anteater Instruction & Research Bldg (AIRB) # 2034, University of California, Irvine CA 92697-3957. Tel: 949-824-0548, Fax: 949-824-0529, email: [junwu@uci.edu](mailto:junwu@uci.edu)

## Contents

|                                                                                                                                                                   |    |
|-------------------------------------------------------------------------------------------------------------------------------------------------------------------|----|
| <b>1. Overview</b> .....                                                                                                                                          | 1  |
| <b>2. Materials and methods</b> .....                                                                                                                             | 1  |
| 2.1 Episodic measurements from two field campaigns.....                                                                                                           | 1  |
| 2.2 Roadway classification.....                                                                                                                                   | 2  |
| 2.3 Decomposition of independent temporal basis functions.....                                                                                                    | 3  |
| 2.4 Procedure of interpolation for UCLA measurements.....                                                                                                         | 4  |
| 2.5 Selection of covariates .....                                                                                                                                 | 6  |
| Table S1. Correlation between average biweekly measured values of collocated monitoring sites of UCI/UCLA and SCAQMD and their linear regression coefficient..... | 8  |
| Table S2. Important notation and symbols.....                                                                                                                     | 9  |
| <b>3. Results</b> .....                                                                                                                                           | 10 |
| Table S3 Statistics of fit parameters by the routine time series and sporadic samples.....                                                                        | 9  |
| Table S4. Estimates of variogram coefficients for spatial residuals for $\beta_0$ , $\beta_1$ and $\beta_2$ .....                                                 | 11 |
| Table S5. Senitivity analysis for interpolation of UCLA data.....                                                                                                 | 12 |
| Table S5. Sensitivity analysis for outliers of episodic samples.....                                                                                              | 13 |
| Figure S1. Box plots of spatially varying coefficients for $\text{NO}_2$ and $\text{NO}_x$ ( $b_0$ - $\beta_0$ ; $b_1$ - $\beta_1$ ; $b_2$ = $\beta_2$ ).....     | 14 |
| Figure S2. Non-linear relationship between $\beta_0$ and local covariates for $\text{NO}_2$ by GAM....                                                            | 15 |
| Figure S3. Non-linear relationship between $\beta_1$ and local covariates for $\text{NO}_2$ by GAM....                                                            | 17 |
| Figure S4. Non-linear relationship between $\beta_2$ and local covariates for $\text{NO}_2$ by GAM....                                                            | 18 |
| Figure S5. Non-linear relationship between $\beta_0$ and local covariates for $\text{NO}_x$ by GAM)....                                                           | 19 |
| Figure S6. Non-linear relationship between $\beta_1$ and local covariates for $\text{NO}_x$ by GAM.....                                                           | 21 |
| Figure S7. Non-linear relationship between $\beta_2$ and local covariates for $\text{NO}_x$ by GAM.....                                                           | 22 |
| Figure S8. Average values of long-term concentrations: observed values vs. estimated values.....                                                                  | 23 |
| <b>4. Reference</b> .....                                                                                                                                         | 24 |



1 **1. Overview**

2 This paper introduces a hierarchical model to predict spatiotemporal variability of  
3 nitrogen dioxide (NO<sub>2</sub>) and nitrogen oxides (NO<sub>x</sub>) concentrations in the urban area of  
4 Southern California by combining high temporal resolution data from routine  
5 monitoring stations with high spatial resolution data from investigator-initiated  
6 episodic measurements. Our approach had an improvement for estimation of  
7 spatiotemporal variability of NO<sub>2</sub> and NO<sub>x</sub> concentrations in the Los Angeles region  
8 and this has meaningful indications for studies of short-term health effects.

9 **2. Materials and Methods**

10 A hierarchical two-stage model was designed to estimate the spatiotemporal variability  
11 of NO<sub>2</sub> and NO<sub>x</sub> concentrations.

12 *2.1. Episodic measurements from two field campaigns*

13 1) Measurements Collected by University of California, Los Angeles (UCLA): NO<sub>2</sub> and NO<sub>x</sub>  
14 samples were collected using passive Ogawa samplers (Ogawa & Company USA, Inc.,  
15 Pompano Beach, FL) in two continuous weeks in a warm season (September 16-October 1,  
16 2006) and a cold season (February 10-25, 2007) in Los Angeles County, California. Each  
17 sampler was deployed for a two-week period. The sampling locations were selected using a  
18 location-allocation algorithm that maximized the potential variability in measured pollutant  
19 concentrations and the spatial distribution of the targeted study population (Su et al., 2009).  
20 There were a total of 161 valid samples of measurements in each season. We also conducted  
21 additional measurements co-located at 14 SCAQMD stations.

22 2) Measurements Collected by University of California, Irvine (UCI): Residential  
23 outdoor samples of NO<sub>2</sub> and NO<sub>x</sub> were collected using passive Ogawa samplers (Ogawa &

24 Company USA, Inc., Pompano Beach, FL) for two weeks in the warm season (July 10-18 and  
25 July 24-August 1) and the cool season (November 13-21 and December 4-12) in 2009 in  
26 south Los Angeles County and Orange County, California. Sampling sites were outdoor  
27 homes of subjects who participated in an air pollution and pregnancy outcome study funded  
28 by the National Institute of Environmental Health Sciences; i.e. participants who agreed to  
29 allow us to conduct outdoor sampling at their homes. There were a total of 32 valid  
30 measurements in each sampling week. We again co-located sampling at 11 SCAQMD  
31 stations. Sampling sites of both the UCLA and UCI episodic measurements are not shown  
32 in Figure 1 to protect the confidentiality of human subjects.

33 Systematic bias is possible for the measurements taken by the active samplers at the  
34 SCAQMD sites and the passive samplers used in the UCLA and UCI field campaigns. We  
35 adjusted for such potential systematic bias by converting all measurements from passive  
36 samplers to the equivalent values of the active samplers based on the co-located  
37 measurements from the SCAQMD sites ([Supplemental Materials Table S1](#) gives specific  
38 adjustment coefficients by linear regression for both the UCLA and the UCI measurements).

## 39 *2.2. Roadway classification*

40 We obtained roadway data for the study region from the ESRI StreetMap™ North America  
41 9.3 (<http://www.esri.com>). This dataset included 2003 TeleAtlas® street polylines, which -  
42 as we previously demonstrated – are more accurate than TIGER 2000-based streets (Wu et al.,  
43 2005). We calculated total roadway length within different buffer sizes around each  
44 sampling site and classified roadways into four categories based on the U.S. Census Feature  
45 Class Code (U.S. Census Bureau, 1993): primary highways, typically interstates, with limited  
46 access (A1); primary roads without limited access, non-interstate roads (A2); smaller,

47 secondary or connecting roads, usually with more than two lanes (A3); and local,  
 48 neighborhood and rural roads, usually with a single lane of traffic in each direction (A4). We  
 49 calculated the shortest distance from sampling sites to each roadway type.

### 50 2.3. Decomposition of independent temporal basis functions

51 Theoretically, the temporal basis functions represent the general temporal changes in different  
 52 dimensions of concentrations within the study domain. Average weekly concentrations  
 53 ( $N=5225=209 \text{ weeks} \times 25 \text{ stations}$ ) were first log-transformed and normalized (mean of 0 and  
 54 variance of 1), and then used to construct the independent temporal basis functions (smoothed  
 55 EOFs). As a technique of principle component analysis, singular value decomposition (SVD)  
 56 was used to generate the independent temporal basis functions. The SVD decomposition  
 57 was performed with:

$$58 \quad \mathbf{Y} = \mathbf{U}\mathbf{\Sigma}\mathbf{V}^* \quad [A1]$$

59 where  $\mathbf{Y} = (\vec{y}(1), \dots, \vec{y}(n))$  and  $\vec{y}(u) = (y_{u1}, \dots, y_{um})^T$ , the  $m \times n$  normalized matrix of the  
 60 logarithmic transformation of routine observed concentrations,  $n$  is the number of sites and  $m$   
 61 is the total number of time slices.  $\mathbf{U} = (\vec{u}(1), \dots, \vec{u}(m))$  and  $\vec{u}(k) = (u_{k1}, \dots, u_{km})^T$ ,  $m \times m$   
 62 real matrix whose columns represents temporal basis series (called left singular vectors),  $\mathbf{\Sigma}$  is  
 63 an  $m \times n$  diagonal matrix with nonnegative real numbers (called singular values) on the  
 64 diagonal representing the variance explained by each temporal basis series,  $V$  is an  $n \times n$  real  
 65 matrix of right singular vectors ( $V^*$  is the conjugate transpose of  $V$ ) (Marcus and Minc, 1968).  
 66 We used penalized thin plate splines of  $\vec{u}(i)$  in GAM (Duchon, 1977) to model smoothed  
 67 EOF,  $f_i(t)$  in equation [2] of this paper. The derivative based thin plate spline penalty was  
 68 used to measure wiggleness and chose a good degree of freedom between data fitting and  
 69 smoothness. A good degree of freedom should make the smoothed curves not over-fitting  
 70 the data but approximate the truly piece of temporal trend (Szpiro et al., 2010). So its  
 71 selection, while optimizing the fit, should penalize wiggleness. We used Wood and

72 Augustin (2002)'s integrated approach of model selection and automatic smoothing parameter  
73 selection with generalized cross-validation (GCV) used to determine the smoothness  
74 parameters..

#### 75 *2.4. Procedure of interpolation for UCLA measurements*

76 We used the 25 routine measurements and the linear spatiotemporal model to derive the ratios  
77 of two continuous weekly concentrations for UCLA's measurements respectively for  
78 2006 and 2007 (09/16/06-10/01/06 and 02/10/07-02/25/07). The steps are described  
79 as followed.

- 80 (1) Similar to Section 3.1 of the paper, the 25 routine measurements of time  
81 series were used to construct the temporal basis functions that were smoothed  
82 using GAM to represent the temporal trends of the temporal basis functions  
83 for the study domain;
- 84 (2) 1 or 2 traffic-related covariates as emission sources or proxy to emission  
85 sources and wind speeds as a dispersion factor were extracted for the  
86 locations of the routine measurements. Due to few samples (just 25 samples  
87 from the SCAQMD routine stations), we just used 2 or 3 covariates to avoid  
88 over-fitting in linear regression. For emission sources, distance-weighted  
89 roadway length, AADT or traffic land-use statistics was calculated around the  
90 measurement sites using the optimal buffering distance (see Section 2.3.1 of  
91 the paper for determination of buffering distance). Since we just had few  
92 samples (25), only a covariate of emission factor with the highest Pearson's

93 correlation and p-value<0.1 was used with long-term average wind speed in  
94 the linear model.

95 (3) A simplified maximum likelihood method without incorporation of spatial  
96 autocorrelation was used to estimate the spatially varying coefficients for the  
97 temporal basis functions:

$$98 \quad \hat{\Psi} = \operatorname{argmax}_{\Psi} p(Y_{ut}; \Psi) \quad [A2]$$

99 where  $Y_{ut} = \{y_{ut}\}$  is set of the observations from the log-transformed measured  
100 values of concentrations at location  $u$  and time slice  $t$ ,  $\Psi$  is the coefficients to  
101 be estimated, mainly the linear coefficients of spatial covariates to calculate  
102  $\beta_i$ ;  $p(Y_{ut}; \Psi)$  is the density for  $Y_{ut}$ . Due to too few spatial samples (25)  
103 and independence of temporal basis functions, we did not consider temporal  
104 and spatial dependence in the model different from Szpiro et al.'s method  
105 (2010) for solving  $\beta_{iu}$ , in [A1]. Thus the likelihood function was simplified as:

$$106 \quad \ln L = -(n/2) \ln(2\pi) - (n/2) \ln(\sigma^2) - (\sigma^2/2) \sum (Y_{ut} - \mu_Y(\Psi)) \quad [A3]$$

107 in [A3],  $\sum_Y(\Psi)$  was simplified as  $(\sigma^2)^n$  without consideration of spatial  
108 autocorrelation.

109 (4) Based on the linear coefficients solved above ( $\hat{\Psi}$ ), we could get an initial  
110 estimates for mean concentrations at the UCLA sampling locations,  $u^*$  at  
111 particular time slices,  $t = \{t_{11}, t_{12}, t_{21}, t_{22}\}$ , assuming  $t_{11}$  and  $t_{12}$  for  
112 09/16/06-09/23/06 and 09/24/06-10/01/06 as well as  $t_{21}$  and  $t_{22}$  for  
113 02/10/07-02/17/07 and 02/18/07-02/25/07.



114 
$$\hat{Y}_{u^*t}^* = E(\hat{Y}_{u^*t}^* | Y_{ut}; \Psi = \hat{\Psi}) \quad [A3]$$

115 where  $\hat{Y}_{u^*t}^*$  is the concentration to be interpolated for UCLA's measurement  
 116 site,  $u^*$ .

117 (5) Based on [A3], we got the estimates for four time slices and then estimated  
 118 their ratio along with two continuous weeks.

119 
$$r_1 = \hat{Y}_{u^*t_{11}}^* / \hat{Y}_{u^*t_{12}}^* \quad \text{or} \quad r_2 = \hat{Y}_{u^*t_{21}}^* / \hat{Y}_{u^*t_{22}}^* \quad [A4]$$

120 (6) According to the ratios and the observed bi-weeks means, we directly  
 121 estimated the values at each of the four time slices ( $t_{11}, t_{12}, t_{21}, t_{22}$ ) for UCLA's  
 122 episodic sites.

123 *2.5. Selection of covariates*

124 There are two steps for selection of the effective covariates using GAM to correlate spatial  
 125 covariates to temporal basis functions:

126 (1) First, correlation analysis and scatter plots were made to remove the irrelevant covariates  
 127 whose correlation with  $\beta_i$  was less than 0.1 and the scatter plots did not suggest a clear pattern.  
 128 The factors selected were regarded as an initial pool of regressors for next selection.

129 (2) Then, multicollinearity of independent covariates and their statistical significance were  
 130 examined. To avoid multicollinearity, we used variance inflation factors (VIFs) to divide the  
 131 covariates into several groups: a) one group of weakly correlated covariates (VIF<10); the  
 132 following 2 type of groups of remaining highly correlated covariates (VIF  $\geq$  10): b)  
 133 traffic-related groups including shortest distances to different types of roadways (A1, A2, A3,  
 134 or A4), distance-weighted roadway length, traffic land-use, weighted AADT; c) land-use  
 135 group including different types of land-use.

136 (3) Next, backward-selection was iteratively conducted until the optimal set of covariates  
137 selected. Specifically, we selected one covariate at a time from each group of the highly  
138 correlated covariates and combined them with all of the weakly correlated covariates to  
139 construct a combination of covariates for predicting  $\beta_i$ . All of the covariates were tested in  
140 the model.  $R^2$  was used to backward-select the covariates in each combination: the covariates  
141 with p values  $\geq 0.1$  were removed until  $R^2$  remained the same, improved, or decreased least  
142 when all possible combinations of the remaining covariates were considered. Finally, the  
143 covariate combination with the maximum  $R^2$  was selected as optimal regressors.

144

145

146

147

148

149

150

151

152

153

154

155

156

157 Table S1. Correlation between average biweekly measured values of collocated  
 158 monitoring sites of UCI/UCLA and SCAQMD and their linear regression coefficients

| Source | Pollutant       | Number of collocated locations | Correlation coefficient | Parameters |            |
|--------|-----------------|--------------------------------|-------------------------|------------|------------|
|        |                 |                                |                         | Slope      | Intercepts |
| UCI    | NO <sub>2</sub> | 14                             | 0.98                    | 0.88       | 5.20       |
|        |                 |                                | 0.99                    | 0.94       | 3.56       |
|        |                 |                                | 0.996                   | 0.58       | 12.91      |
|        |                 |                                | 0.95                    | 0.65       | 7.74       |
|        |                 |                                | 0.96                    | 0.69       | 8.53       |
|        |                 |                                | 0.95                    | 0.69       | 5.46       |
| UCLA   | NO <sub>x</sub> | 14                             | 0.96                    | 1.22       | -13.41     |
|        |                 |                                | 0.97                    | 0.72       | 14.38      |
|        |                 |                                | 0.94                    | 0.68       | 4.43       |
|        |                 |                                | 0.95                    | 1.00       | 0.29       |
|        |                 |                                | 0.98                    | 0.80       | 2.38       |
|        |                 |                                | 0.97                    | 0.81       | 12.05      |

159  
 160  
 161  
 162  
 163  
 164  
 165  
 166  
 167

Table S2. Important notation and symbols

| Symbol                         | Meaning                                                                                                                                                    |
|--------------------------------|------------------------------------------------------------------------------------------------------------------------------------------------------------|
| $y_{ut}$                       | Log-transformed concentrations at time slice, $t$ and location, $u$ ; $\hat{y}_{ut}$ is the estimated value for $y_{ut}$ by the model.                     |
| $\mu_{ut}$                     | Mean trend value at time slice, $t$ and location $u$ . It represents the seasonal trend. $\hat{\mu}_{ut}$ is the estimate by model.                        |
| $\varepsilon_{ut}$             | Spatiotemporal residual at time slice, $t$ and location, $u$ . $\hat{\varepsilon}_{ut}$ is the estimate.                                                   |
| $\beta_{iu}$                   | $i^{\text{th}}$ spatially varying coefficient for the $i^{\text{th}}$ temporal basis function. $\hat{\beta}_{iu}$ is the estimate.                         |
| $\beta_i$                      | Set of the $i^{\text{th}}$ spatially varying coefficient across all the locations.                                                                         |
| $f_i(t)$                       | $i^{\text{th}}$ temporal basis function. $f_0(t)$ is the constant function.                                                                                |
| $\varepsilon_u$                | Set of spatiotemporal residual at $u$ across all the time slices.                                                                                          |
| $\hat{\beta}_{iu}(X)$          | Estimate of the mean for $\beta_{iu}$ modeled using set of spatial covariates ( $X$ )                                                                      |
| $\hat{\varepsilon}_{ius}(Z)$   | Estimate of the spatial residual at $u$ for $\hat{\beta}_{iu}$ , $Z \in Nb(u)$                                                                             |
| $\hat{\varepsilon}_{iun}$      | Random residual at $u$ , with normal distribution, $\hat{\varepsilon}_{iun} \sim N(0,1)$                                                                   |
| $E(\hat{\beta}_{iu})$          | Same as $\hat{\beta}_{iu}(X)$                                                                                                                              |
| $g(E(\hat{\beta}_{iu}))$       | Link function for normal distribution between regression equation and $E(\hat{\beta}_{iu})$ .                                                              |
| $s_w(w_{su}, w_{cu})$          | Smooth function for wind speeds of both directions at $u$ . $w_{su}$ indicates wind speed along with south-north, $w_{cu}$ indicates along with west-east. |
| $s_j(x_u^j)$                   | Smooth functions for other local covariates.                                                                                                               |
| $\gamma_k$                     | Linear coefficient for the $k^{\text{th}}$ linear regressor, $x^k$ .                                                                                       |
| $\Theta(\phi, \sigma^2, \tau)$ | Variogram parameters (range $\phi$ , partial sill $\sigma^2$ and coefficient $\tau$ )                                                                      |
| $\hat{\varepsilon}_{us}(u_i)$  | Estimate of the spatial residual at the neighboring location, $u_i$ ,                                                                                      |
| $\hat{\varepsilon}_{rs}(u_i)$  | Estimate of the regional residual or total variation of $\beta_i$ .                                                                                        |
| $\Sigma_{ij}$                  | Variogram output of matrix.                                                                                                                                |
| $\lambda_{u_i}^u$              | Optimal weights for $\hat{\varepsilon}_{us}$ , estimated by cokriging.                                                                                     |
| $\lambda_{u_i}^r$              | Optimal weights for $\hat{\varepsilon}_{rs}$ , estimated by cokriging.                                                                                     |

169 Note: For the covariate defined above, if a cap sign like  $\hat{\cdot}$  is added on the top of a  
170 covariate, it indicates the estimated or predicted value for this covariate.

171 **3. Results**

172 [Table S3. Statistics of fit parameters by the routine time series and sporadic samples](#)

| Statistics                | NO <sub>2</sub> |           |           | NO <sub>x</sub> |           |           |
|---------------------------|-----------------|-----------|-----------|-----------------|-----------|-----------|
|                           | $\beta_0$       | $\beta_1$ | $\beta_2$ | $\beta_0$       | $\beta_1$ | $\beta_2$ |
| Min                       | 0.59            | -3.05     | -15.03    | 0.69            | -16.29    | -12.03    |
| Max                       | 3.46            | 15.60     | 12.5      | 4.32            | 2.05      | 15.17     |
| Mean                      | 2.90            | 5.72      | 0.06      | 3.51            | -9.22     | 0.80      |
| Variance                  | 0.13            | 11.11     | 19.14     | 0.20            | 8.3       | 17.96     |
| Interquartile range (IQR) | 0.37            | 2.15      | 2.77      | 0.42            | 2.88      | 5.89      |
| Median                    | 3.01            | 5.20      | -0.26     | 3.62            | -9.27     | 1.00      |

173

174

175

176

177

178

179

180

181

182

183

Table S4. Variogram coefficients of Spatial Residuals for  $\beta_0$ ,  $\beta_1$  and  $\beta_2$ 

| Statistics        | NO <sub>2</sub> |           |           | NO <sub>x</sub> |           |           |
|-------------------|-----------------|-----------|-----------|-----------------|-----------|-----------|
|                   | $\beta_0$       | $\beta_1$ | $\beta_2$ | $\beta_0$       | $\beta_1$ | $\beta_2$ |
| Model             | Stable          | Exp*      | Stable    | Stable          | Exp*      | Stable #  |
| Model parameter   | 0.82            | -         | 0.2       | 0.2             | -         | 2         |
| Range             | 7.4 km          | 0.9 km    | 2.2 km    | 5.5 km          | 1.0 km    | 2.5km     |
| Partial sill 1*** | 0.013           | 4.5       | 3.8       | 0.016           | 1.2       | 2.4       |
| Partial sill 2    | 0.009           | 2.8       | 1.7       | 0.02            | 1.1       | 1.7       |
| Partial sill 3    | 0.04            | 4.4       | 3.2       | 0.05            | 1.8       | 2.4       |

184 Note: \*: Exp: exponential variaogram model. #: Stable model (Johnston et al., 2003).

185 \*\*: partial sill 1 is for local residuals; partial sill 2 is for covariance between local

186 residuals and regional residuals; partial sill 3 for regional residuals. Nugget was

187 assumed to be 0 given the strong spatial autocorrelation of the residuals (Szpiro et al.,

188 2010).

189

190

191

192

193

194

195

196

197

Table S5. Sensitivity analysis for interpolation of UCLA samples

| Description                   | Type                  | R <sup>2</sup> for time series <sup>(1)</sup> | R <sup>2</sup> for long-time averages <sup>(2)</sup> |
|-------------------------------|-----------------------|-----------------------------------------------|------------------------------------------------------|
| <b>Method 1<sup>(3)</sup></b> | <b>NO<sub>2</sub></b> | <b>0.84</b>                                   | <b>0.89</b>                                          |
|                               | <b>NO<sub>x</sub></b> | <b>0.81</b>                                   | <b>0.77</b>                                          |
| Method 2                      | NO <sub>2</sub>       | 0.82                                          | 0.87                                                 |
|                               | NO <sub>x</sub>       | 0.63                                          | 0.75                                                 |
| Method 3                      | NO <sub>2</sub>       | 0.83                                          | 0.87                                                 |
|                               | NO <sub>x</sub>       | 0.86                                          | 0.72                                                 |

198 Note: Note: (1) R-Square between the predicted values of all the time series for the routine  
 199 stations and the temporal trends based on their observed values; (2) R-Square between the  
 200 averages of the predicted values over 4 years for the 25 routine stations and averages of their  
 201 observed values over 4 years; (3) Results from the original paper.

202

Table S6. Sensitivity analysis for outliers of episodic samples

| Description                                  | Type            | Thresholds                                                               | Number of samples <sup>1</sup> | R <sup>2</sup> for time series | R <sup>2</sup> for long-time averages | 203<br>204 |
|----------------------------------------------|-----------------|--------------------------------------------------------------------------|--------------------------------|--------------------------------|---------------------------------------|------------|
| 1. No thresholds set to remove outliers      | NO <sub>2</sub> | No outliers removed                                                      | 32+161+31=224                  | 0.74                           | 0.84                                  | 205        |
|                                              | NO <sub>x</sub> | No outliers removed                                                      | 32+161+31=224                  | 0.74                           | 0.67                                  | 206        |
| 2. Lower and upper inner fences <sup>2</sup> | NO <sub>2</sub> | $\beta_0$ : [-0.2,3.7], $\beta_1$ : [-2.3,6.8], $\beta_2$ : [-12.2,4.5]  | 14+154+31=199                  | 0.88                           | 0.89                                  | 207        |
|                                              | NO <sub>x</sub> | $\beta_0$ : [1.0,4.7], $\beta_1$ : [-15.8,1.8], $\beta_2$ : [-8.1,9.4]   | 13+160+30=203                  | 0.87                           | 0.70                                  | 208        |
| 3. Lower and upper outer fences <sup>3</sup> | NO <sub>2</sub> | $\beta_0$ : [-0.2,4.2], $\beta_1$ : [-2.4,12.3], $\beta_2$ : [-12.3,8.4] | 28+157+31=216                  | 0.84                           | 0.89                                  | 209        |
|                                              | NO <sub>x</sub> | $\beta_0$ : [0.7,5.0], $\beta_1$ : [-17.7,3.7], $\beta_2$ : [-9.7,11]    | 26+161+31=218                  | 0.81                           | 0.77                                  |            |

210 Note: 1. number of UCI samples+ number of UCLA samples+ number of SCAQMD sites=total number of samples; 2. Lower and upper inner  
 211 fences defined as  $Q1-1.5*IQR$  and  $Q3+1.5*IQR$  where  $Q1$  and  $Q3$  are respectively the first and third quartiles, and  $IQR$  is inter-quartile range. If  
 212 a sample's  $\beta_i$  is smaller than lower upper inner fence or bigger than upper inner fence, the sample will be removed from the dataset; 3. Similarly,  
 213 lower and upper outer fences defined as  $Q1-3*IQR$  and  $Q3+3*IQR$ . This was what we have used for the main results.

214

215



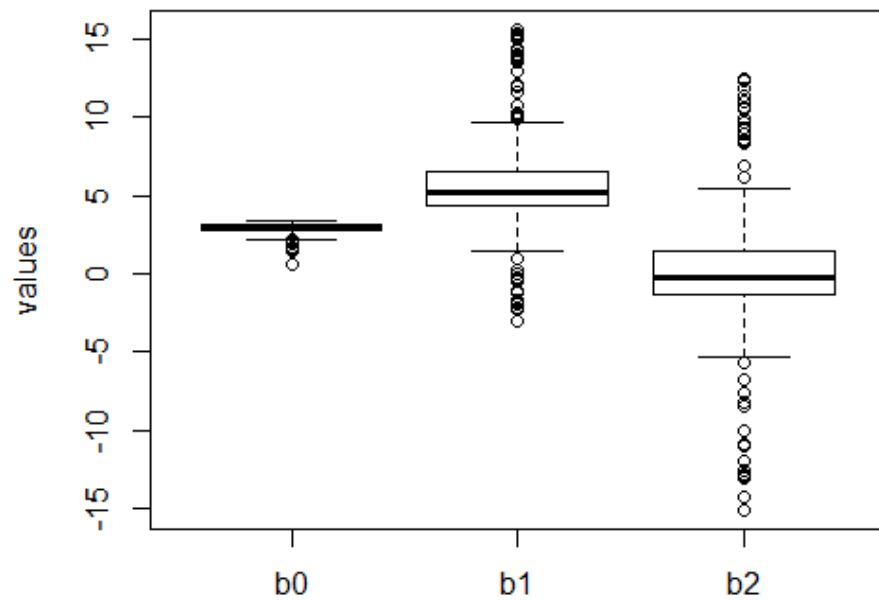

b type  
a. NO<sub>2</sub>

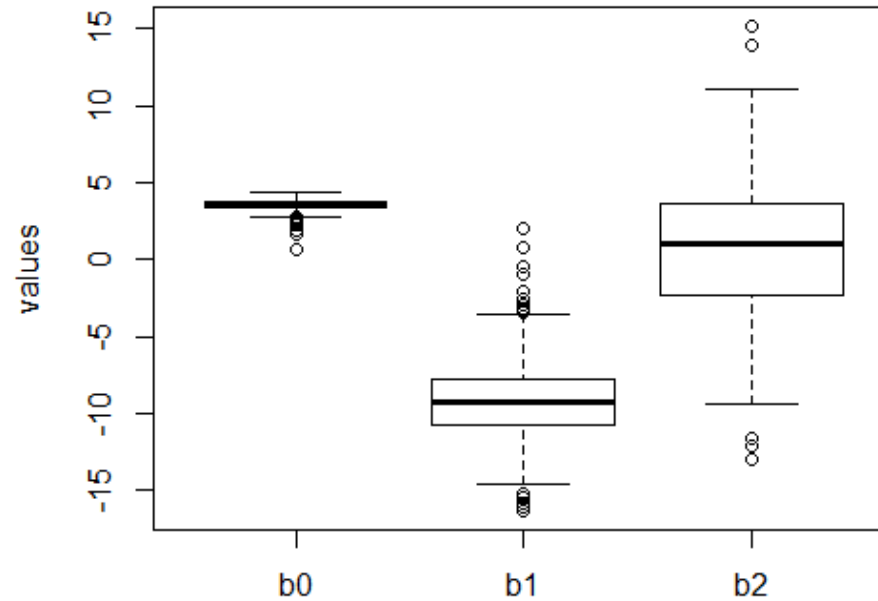

b type  
b. NO<sub>x</sub>

216

217

218

Figure S1. Box plots of spatially varying coefficients for NO<sub>2</sub> and NO<sub>x</sub> ( $b_0-\beta_0$ ;  $b_1-\beta_1$ ;  $b_2=\beta_2$ )

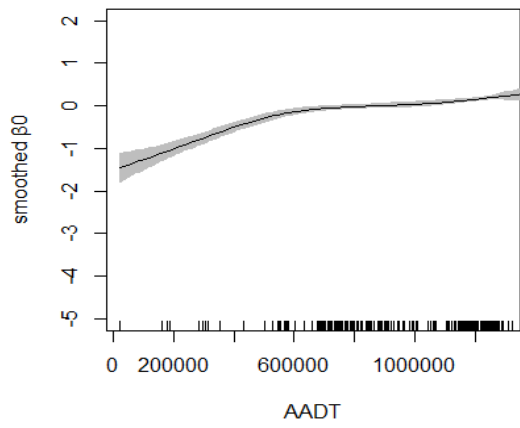

219

AADT

220

a

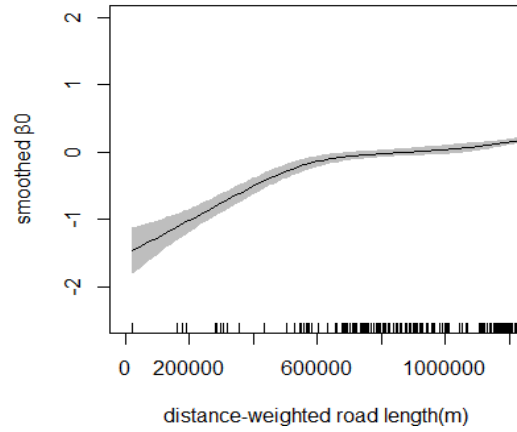

distance-weighted road length(m)

b

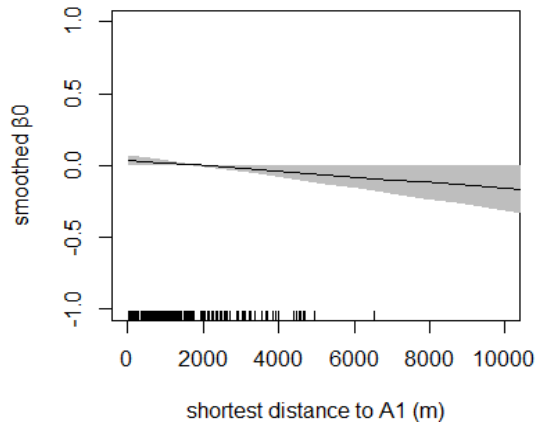

221

shortest distance to A1 (m)

222

c

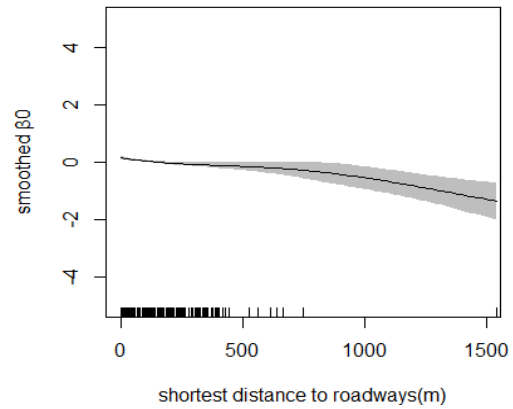

shortest distance to roadways(m)

d

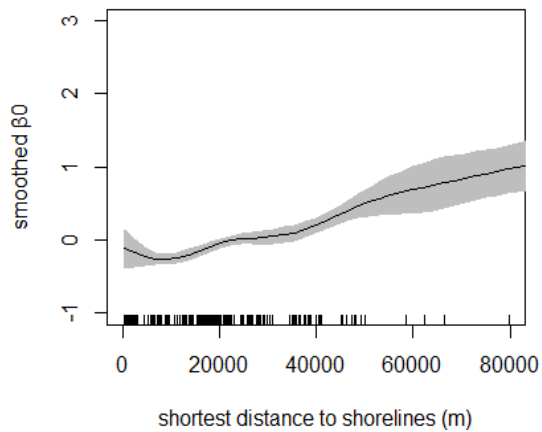

223

shortest distance to shorelines (m)

224

e

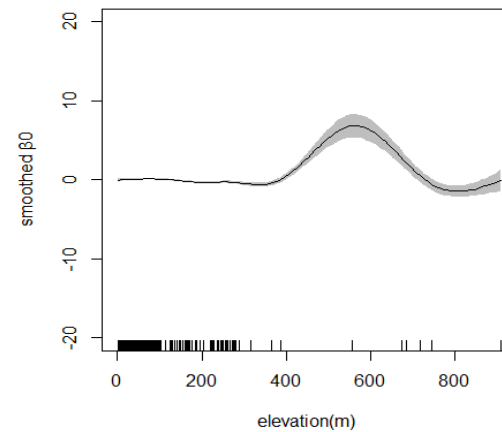

elevation(m)

f

225 Figure S2. Non-linear relationship between  $\beta_0$  and local covariates with the 95%  
 226 confidence intervals for  $\text{NO}_2$  by GAM (to be continued)

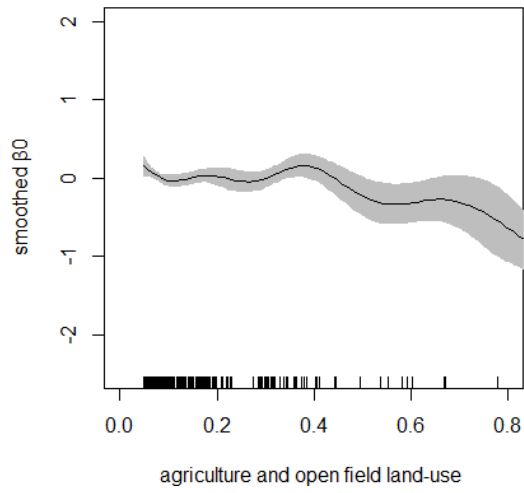

227

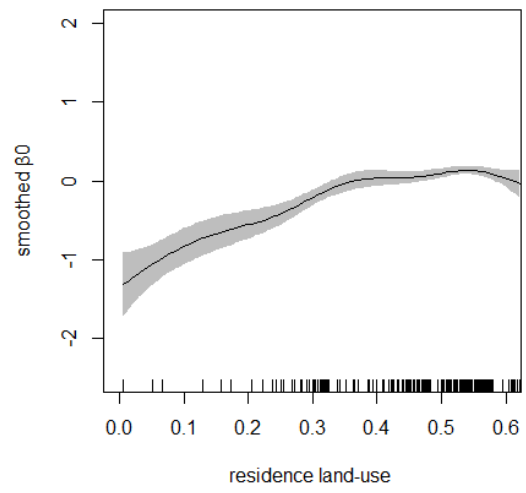

228

g

h

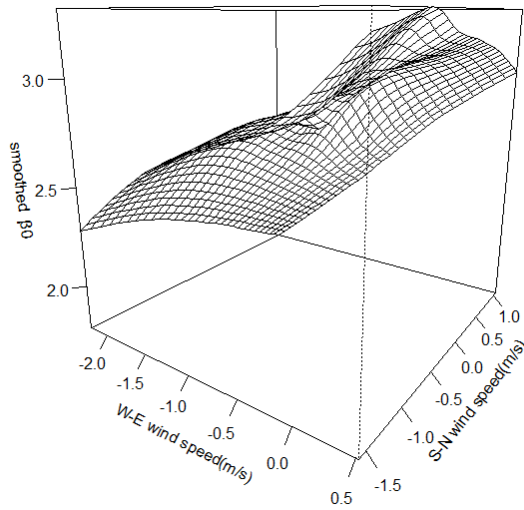

229

230 i (wind speeds in west-east (W-E) and south-north (S-N))

231 Figure S2. Non-linear relationship between  $\beta_0$  and local covariates with the 95%

232 confidence intervals for  $\text{NO}_2$  by GAM (continued)

233

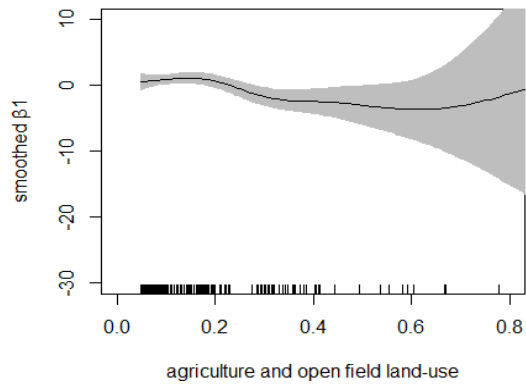

234

agriculture and open field land-use

a

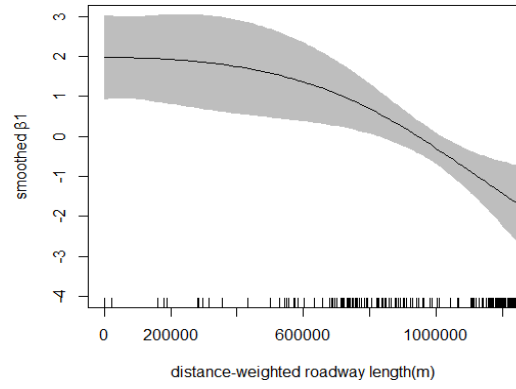

235

distance-weighted roadway length(m)

b

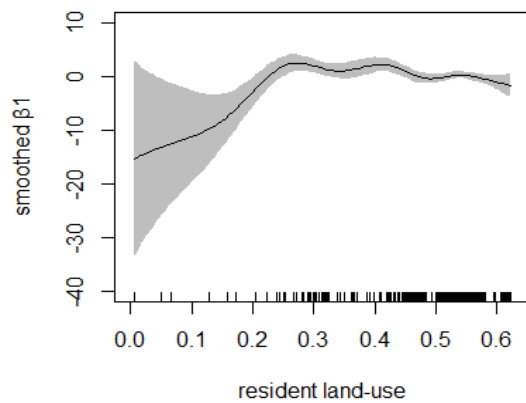

236

resident land-use

c

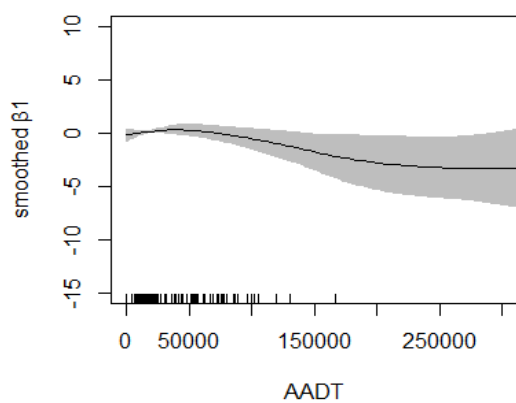

237

AADT

d

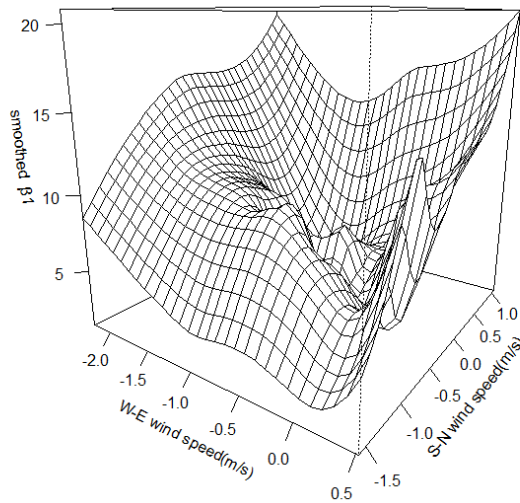

238

e (wind speeds in W-E and S-N)

239

240 Figure S3. Non-linear relationship between  $\beta_1$  and local covariates with the 95%  
 241 confidence intervals for NO<sub>2</sub> by GAM

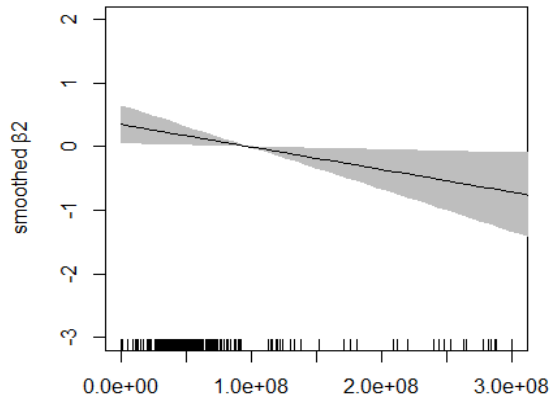

242

AADT

243

a

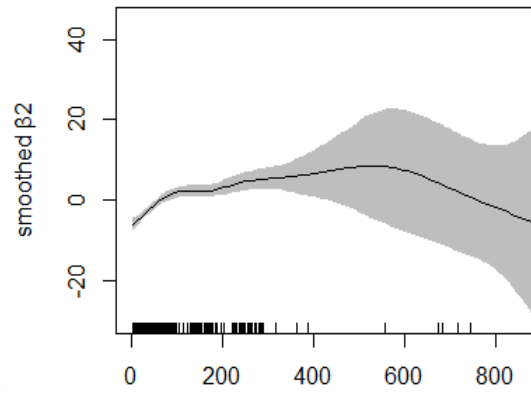

elevation(m)

b

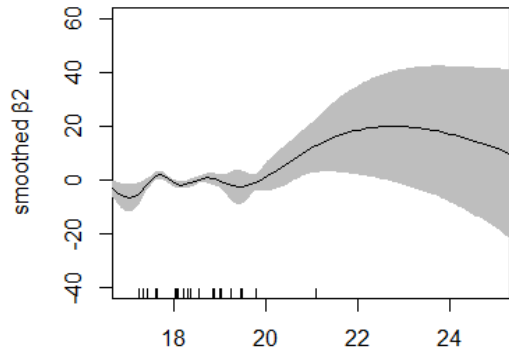

244

long-term average temperature

245

c

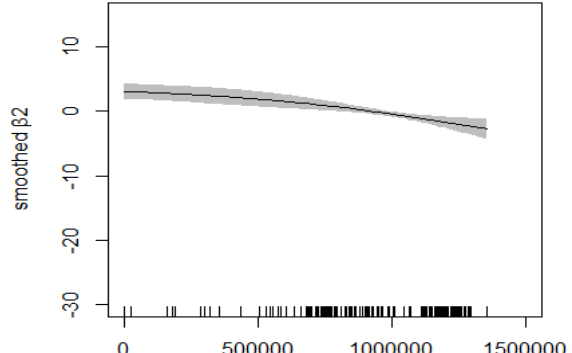

distance-weighted roadway length (m)

d

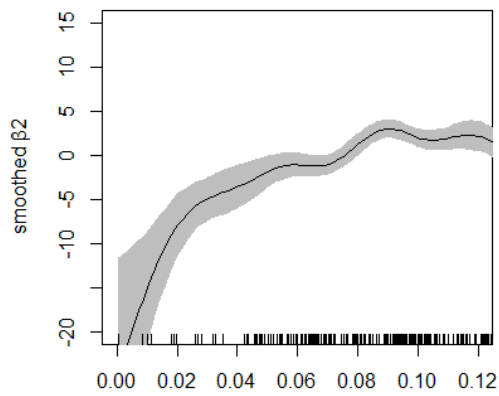

246

commercial land-use

247

e

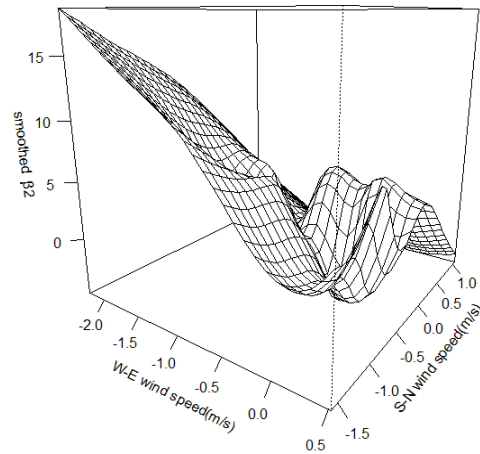

f (wind speeds in W-E and S-N)

Figure S4. Non-linear relationship between  $\beta_2$  and local covariates with the 95% confidence intervals for  $\text{NO}_2$  by GAM

250

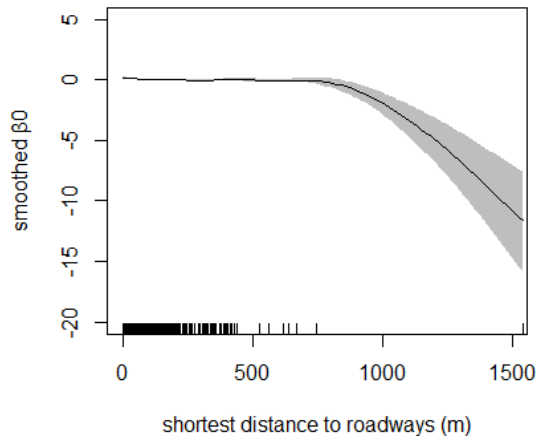

251  
252

a

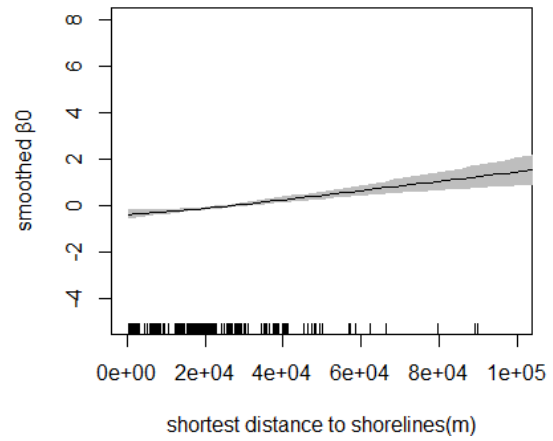

b

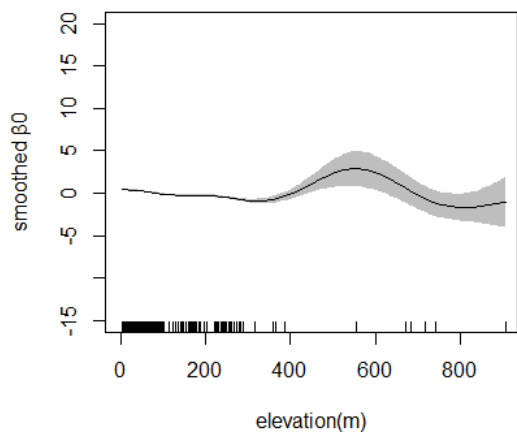

253  
254

c

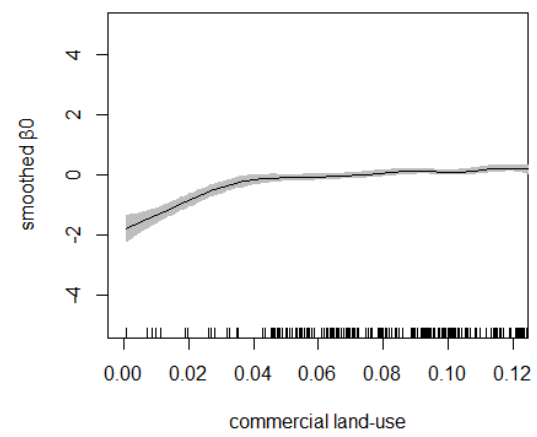

d

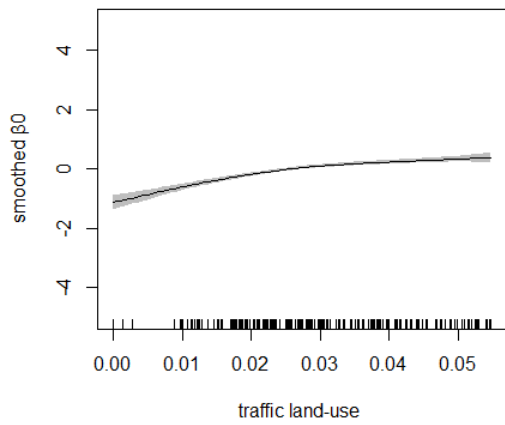

255  
256

e

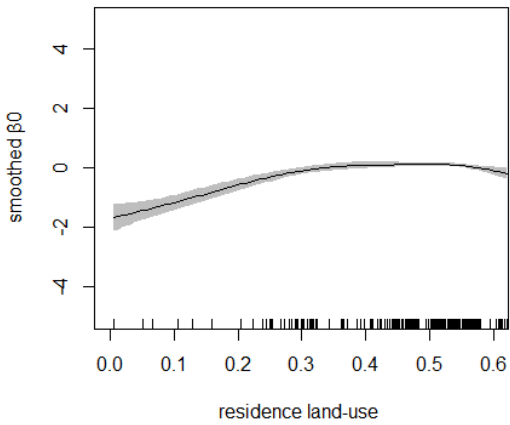

f

257 Figure S5. Non-linear relationship between  $\beta_0$  and local covariates with the 95%  
258 confidence intervals for  $\text{NO}_x$  by GAM (to be continued)

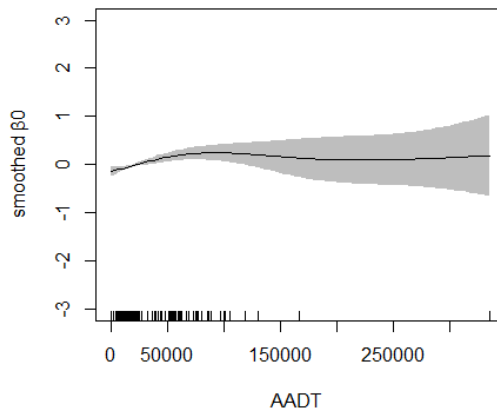

259

AADT

g

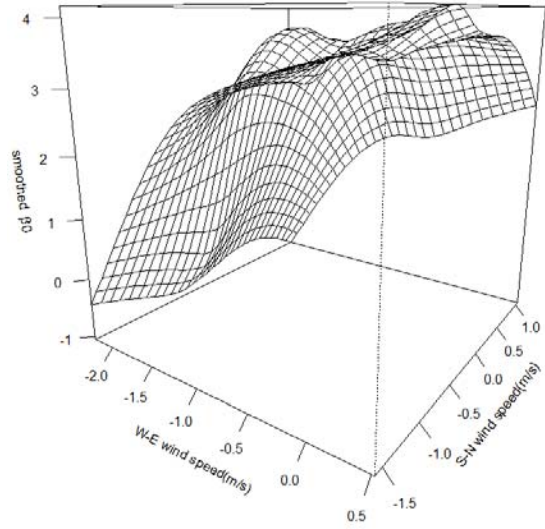

260

h (wind speeds in W-E and S-N)

261 Figure S5. Non-linear relationship between  $\beta_0$  and local covariates with the 95%

262 confidence intervals for  $\text{NO}_x$  by GAM (continued)

263

264

265

266

267

268

269

270

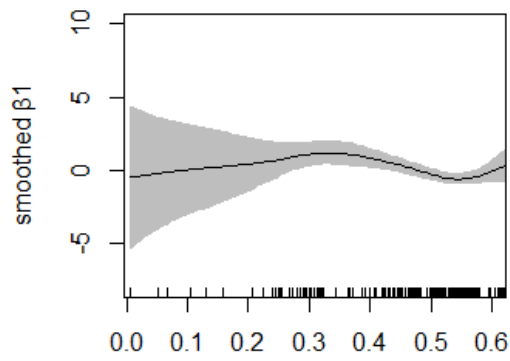

residence land-use

a

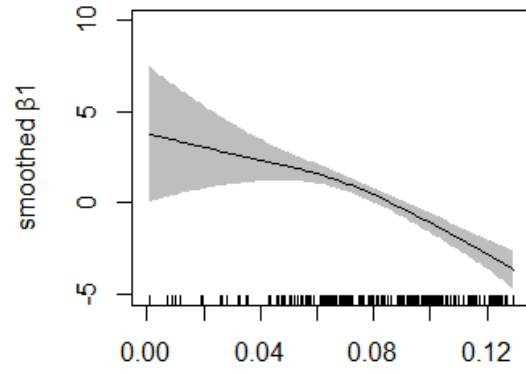

commercial land-use

b

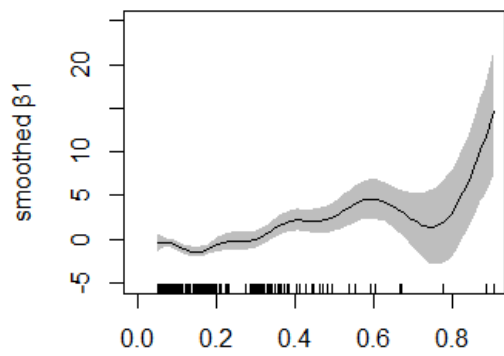

agriculture and open field land-use

c

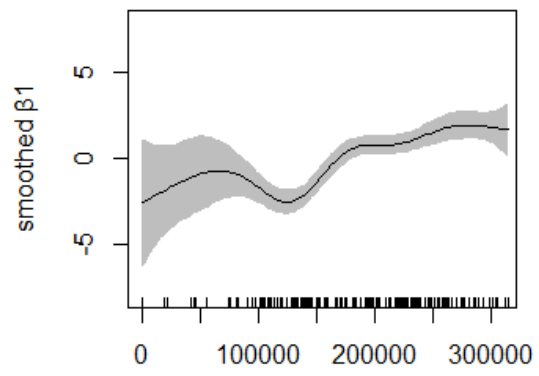

distance-weighted roadway length

d

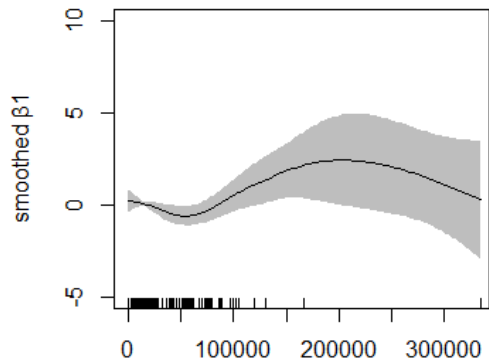

AADT

e

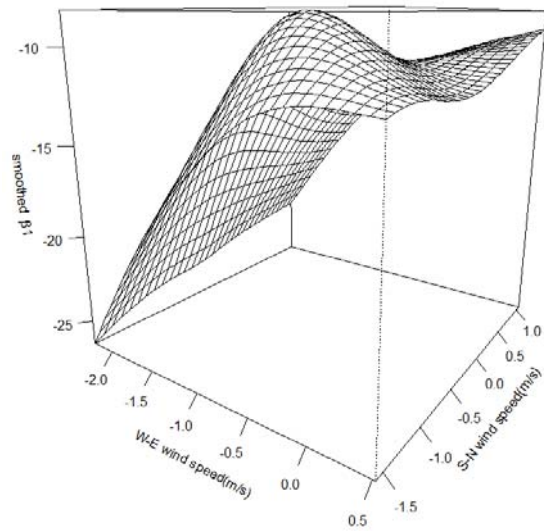

f (wind speeds in W-E and S-N)

Figure S6. Non-linear relationship between  $\beta_1$  and local covariates with the 95% confidence intervals for  $\text{NO}_x$  by GAM

271  
272

273  
274

275

276

277

278

279



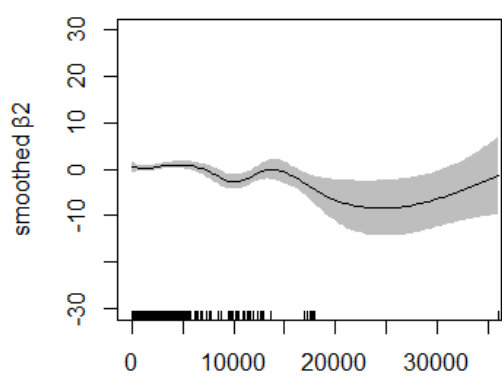

shortest distance to A2 (m)

a

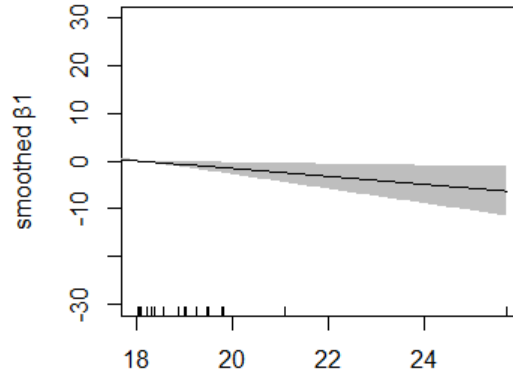

long-term average temperature(C)

b

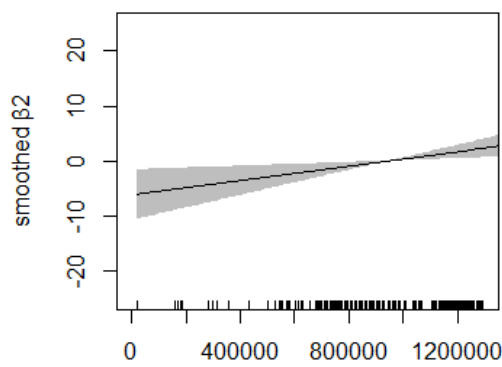

distance-weighted roadway length (m)

c

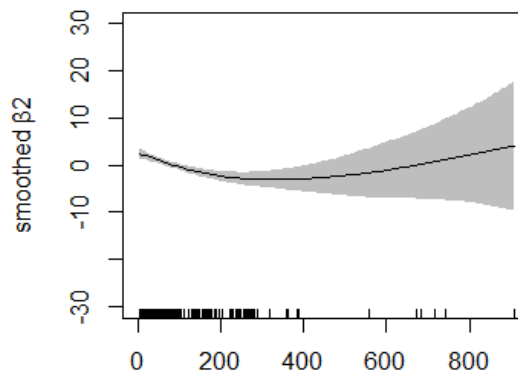

elevation (m)

d

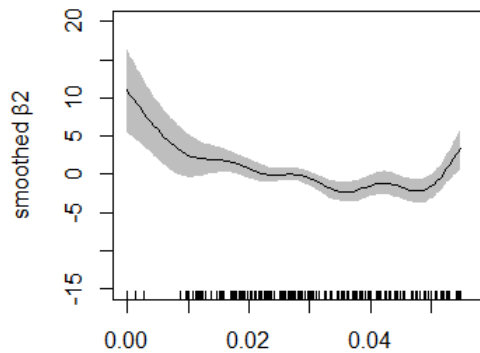

traffic land-use

e

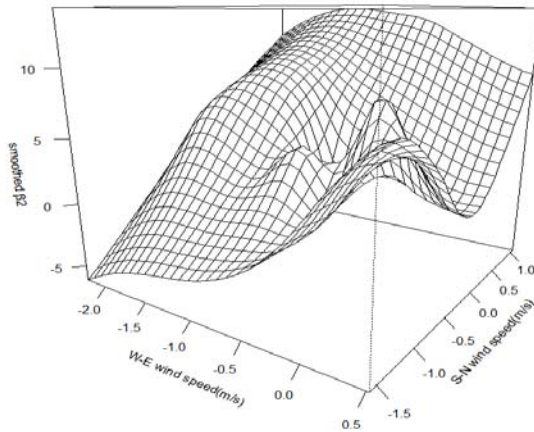

f (wind speeds in W-E and S-N)

Figure S7. Non-linear relationship between  $\beta_2$  and local covariates with the 95% confidence intervals for  $\text{NO}_x$  by GAM

280  
281

282  
283

284  
285  
286  
287

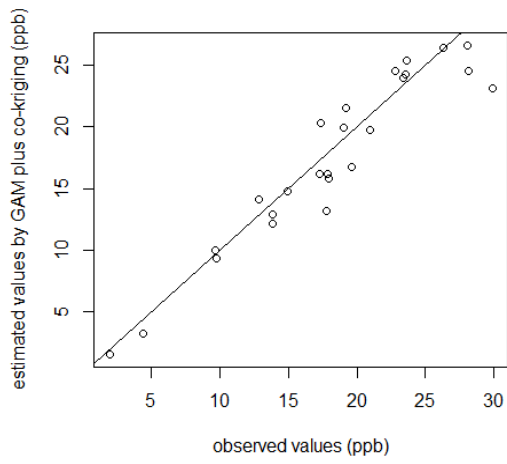

288

a.  $\text{NO}_2$  ( $R^2=0.89$ )

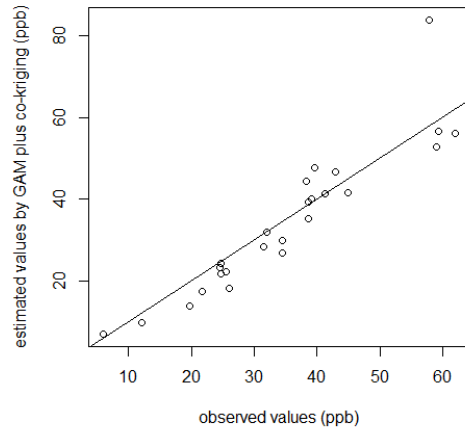

b.  $\text{NO}_x$  ( $R^2=0.77$ )

289

290 Figure S8. Average values of long-term concentrations: observed values vs. estimated values

291

292

293

294

295

296

297

298

299

300

301 **4. References**

302 Duchon, J., 1977. Splines minimizing rotation-invariant semi-norms in solobev spaces, in:  
303 Schemp, W., Zeller, K. (Eds.), Lecture Notes in Mathematics: Construction Theory of  
304 Functions of Several Variables. Springer, Berlin, pp. 85-100.

305 Johnston, K., Hoef, M.J., Krivoruchko, K., Lucas, N., 2003. ArcGIS 9: Using ArcGIS  
306 Geostatistical Analyst, in: ESRI (Ed.).

307 Marcus, M., Minc, H., 1968. Elementary Linear Algebra. The MacMillan Company, NY.

308 Su, G.J., Jerrett, M., Beckerman, B., Wilhelm, M., Ghosh, K.J., Ritz, B., 2009. Predicting  
309 traffic-related air pollution in Los Angeles using a distance decay regression selection  
310 strategy Environmental Research 109, 657-670.

311 Szpiro, A.A., Sampson, D.P., Sheppard, L., Lumley, T., Adar, D.S., Kaufman, D.J., 2010.  
312 Predicting intra-urban variation in air pollution concentrations with complex spatio-temporal  
313 dependencies. Environmetrics 21, 606-631.

314 U.S. Census Bureau, 1993. A Guide to State and Local Census Geography. Association of  
315 Public Data User, Princeton, NJ.

316 Wood, S.N., Augustin, N.H., 2002. GAMs with integrated model selection using penalized  
317 regression splines and applications to environmental modelling. Ecological Modelling 157,  
318 157-177.

319 Wu, J., Funk, T.H., Lurmann, F.W., Winer, A.M., 2005. Improving Spatial Accuracy of  
320 Roadway Networks and Geocoded Addresses. Transactions in GIS 9, 585-601.

321

322
